# Supplementary material for: Natural sea-salt emissions moderate the climate forcing of anthropogenic nitrate
Source: Copernicus journal article supplement (doi:10.5194/acp-20-771-2020), 2020-01-22
Supplement: Supplementary file 1 [file acp-20-771-2020-supplement.pdf]

Supplement of Atmos. Chem. Phys., 20, 771–786, 2020  
<https://doi.org/10.5194/acp-20-771-2020-supplement>  
© Author(s) 2020. This work is distributed under  
the Creative Commons Attribution 4.0 License.

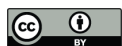

*Supplement of*

## **Natural sea-salt emissions moderate the climate forcing of anthropogenic nitrate**

**Ying Chen et al.**

*Correspondence to:* Yafang Cheng (yafang.cheng@mpic.de) and Ying Chen (chen@tropos.de)

The copyright of individual parts of the supplement might differ from the CC BY 4.0 License.

## 1 **Section S1. Modelling of particulate nitrate in global models**

2 Nitrate is a major anthropogenic aerosol component exerts large radiative scattering (cooling) effect  
3 and is expected to dominate the aerosol cooling by the end of the century (Bellouin et al., 2011; Adams et  
4 al., 2001; Hauglustaine et al., 2014). However, in the IPCC estimation of climate change, nearly all CMIP5  
5 (Coupled Model Intercomparison Project phase 5) global models (IPCC, 2013) and about half of ACCMIP  
6 (The Atmospheric Chemistry and Climate Model Intercomparison Project) global models (Shindell et al.,  
7 2013) did not take nitrate into consideration. Generally, models with a modal aerosol approach of M7 (an  
8 aerosol module, Vignati et al., 2004) or GLOMAP (Global Model of Aerosol Processes, Mann et al., 2010)  
9 do not consider nitrate, although some modified models might add nitrate in M7 and GLOMAP. For  
10 example, EMAC (ECHAM5/MESSy Atmospheric Chemistry model, Karydis et al., 2016) adopts an aerosol  
11 module similar as M7 and includes particulate nitrate (details below); the representation of nitrate is under  
12 developing for GLOMAP and waiting for activation in Hadley Centre Global Environmental Model  
13 (Bellouin et al., 2013).

14 The chemical and thermodynamic equilibrium of semi-volatile ammonium nitrate, i.e., its mass transfer  
15 between gas and particulate phases and partitioning in different sizes, appears to be crucial for modelling the  
16 size distribution and climate effect of particulate nitrate. Fully dynamic mass transfer approach, which  
17 considers the diversity of particulate chemical compositions and mass transfer flux across different particle  
18 sizes dynamically, is the best method to address this issue (Capaldo et al., 2000; Zaveri et al., 2008).  
19 However, it is computationally very expensive for the fully dynamic approach, due to the large difference in  
20 equilibrium time scale of different particle size bins, multicomponent and etc., see detailed description in the  
21 section 3 of Zaveri et al. (2008). The aerosol module MOSAIC (Model for Simulating Aerosol Interactions  
22 and Chemistry, Zaveri et al., 2008), was developed to address dynamic gas-particle partitioning in a  
23 relatively efficient way. It agreed well (Zaveri et al., 2008) with the benchmark equilibrium model AIM  
24 (Aerosol Inorganics Model, Wexler and Clegg, 2002) and was coupled into the regional chemical transport  
25 model WRF-Chem. Bulk equilibrium or ‘hybrid method’ (Capaldo et al., 2000) and other simplifications  
26 have been adopted for nitrate partitioning treatment in some global models for computational efficiency, but  
27 it is difficult for them to capture the ‘re-distribution effect’ of nitrate, as described following.

28 In the GISS (Goddard Institute for Space Studies) model (Liao and Seinfeld, 2005), the gas-particle  
29 transfer of ammonium nitrate is represented by a bulk equilibrium approach over land. To calculate nitrate

30 direct radiative forcing (DRF), the bulk nitrate mass is distributed into different size bins with a pre-fixed  
31 lognormal distribution. They are thus only able to take into account the impact of enhanced total nitrate mass  
32 concentration, but not the competition for nitric acid between fine and coarse modes nor the dynamic impact  
33 on aerosol number/mass size distributions. For example, with GISS GCM II global model, Liao and Seinfeld  
34 (2005) reported that heterogeneous reactions on the surface of natural source aerosols (including sea-salt and  
35 dust) increase the column burdens of particulate nitrate by 30-50% and thus lead to an strengthening of  
36 anthropogenic nitrate DRF by 0-2 W m<sup>-2</sup> over Europe.

37 Xu and Penner (2012) investigated nitrate global DRF with the IMPACT (Integrated Massively Parallel  
38 Atmospheric Chemical Transport) global model, by treating the gas-particle transfer with a 'hybrid' method  
39 (Capaldo et al., 2000). It firstly employed a bulk equilibrium method for fine mode followed by a dynamic  
40 mass transfer method for coarse mode. This approach has limitation in considering the competitive  
41 consumption of gaseous precursors between fine and coarse mode particles, and is difficult to capture the  
42 continuous dynamic evolution of particles size and compositions distributions (Zaveri et al., 2008). Xu and  
43 Penner (2012) showed that sea-salt associated nitrate is one of the most important chemical pathway for the  
44 secondary formation of particulate nitrate, especially over Europe, ocean and coastal regions; however they  
45 mainly focused on the indirect radiative forcing of nitrate, the DRF of sea-salt associated-only nitrate was  
46 not well investigated.

47 Myhre et al. (2006) identifies the deficiency in Liao and Seinfeld (2005) and pointed out that sea-salt  
48 aerosol will deplete HNO<sub>3</sub> and reduce AOD of fine mode nitrate. Myhre et al. (2006) used the Oslo CTM2,  
49 a global chemistry model off-line coupled with a meteorological module, to illustrate the impacts of sea-salt  
50 aerosol on fine mode nitrate and its AOD. The modelling study was based on state-of-the-art algorithms in  
51 2006 and made some simplified assumptions to facilitate computational efficiency. For example, it was  
52 assumed that fine particles are entirely comprised by sulfate and coarse particles by sea-salt aerosol; the later  
53 on condensed fine mode ammonium nitrate was assumed to be externally mixed with a prefixed lognormal  
54 size distribution in optical calculation. This simplification improves computational efficiency but reduces  
55 the multicomponent level. The Equilibrium Simplified Aerosol Model (EQSAM, Metzger et al.,  
56 2002a; Metzger et al., 2002b) was implemented twice to solve the thermodynamic equilibrium firstly for fine  
57 mode and then followed by the coarse mode. However, to reduce the computational burden for a global  
58 model, the fully dynamic mass transfer between particle sizes was not considered in the study. With the bulk

59 equilibrium method (EQSAM) and assuming an instant equilibrium for both fine and coarse mode particles,  
60 the ‘re-distribution effect’ of nitrate could be overestimated since the coarse mode needs extended time to  
61 reach equilibrium (Myhre et al., 2006). Myhre et al. (2006) evaluated that the depletion of  $\text{HNO}_3$  by sea-salt  
62 aerosol may reduce 25% of  $\text{AOD}_{\text{nitrate}}$  in fine mode on a global scale, which is consistent with the upper limit  
63 of our estimation for Europe.

64 ISORROPIA (an aerosol thermodynamic model, Nenes et al., 1998) is adopted in the GEOS-Chem  
65 global CTM model, which consider particles as a bulk for the equilibrium. The partitioned nitrate is then  
66 proportioned to each size bin according to sulfate mass (Yu and Luo, 2009). In INCA (Interaction with  
67 Chemistry and Aerosols) model, the nitrate irreversibly condenses on particle surface (Bauer et al., 2004),  
68 therefore no equilibrium between gas and particulate phases. There is only accumulation mode nitrate in  
69 HadGEN2 model (the Earth system model of the UK Met Office Hadley Centre, Bellouin et al., 2011).  
70 Therefore, the ‘re-distribution’ of pre-existing fine mode ammonium nitrate to sea-salt aerosol surface cannot  
71 be captured by these models.

72 EMAC adopts a modal aerosol approach similar to M7, with modification to include particulate nitrate  
73 (Karydis et al., 2016). It treats gas-particle partitioning with GMXe (Global Modal-aerosol eXtension,  
74 Pringle et al., 2010), and calculates the partitioning process in two stages. First, the amount of gaseous  
75 species which is able to kinetically condense on each mode is estimated, based on diffusion limited  
76 condensation. Second, ISORROPIA or EQSAM (choose either of them) is employed for thermodynamic  
77 calculation in each mode separately, assuming instant equilibrium between gas and particulate phase. The  
78 competition of existing nitric acid between fine and coarse modes can be partly considered in this treatment.  
79 However, ISORROPIA and EQSAM are both bulk approaches, and the diversity of components in different  
80 particle sizes is not considered. In the EMAC model, the association of nitrate with fine and coarse mode  
81 particles is considered separately. When abundant sea-salt aerosol mixes with a nitrate-rich air mass, the  
82 ambient gaseous precursors may not suffice for condensation. The evaporation of fine mode ammonia nitrate  
83 can complement the shortage of gaseous species, and a significant ‘re-distribution effect’ occurs. A fully  
84 dynamic mass transfer approach would provide more insight in the ‘re-distribution effect’.

85  
86  
87

88 **Section S2. WRF-Chem simulation**

89 The WRF-Chem model was driven by NCEP reanalysis data ( $1^\circ \times 1^\circ$  resolution and provided every 6  
90 hours), including the Final Analysis Operational Global Analysis (<http://rda.ucar.edu/datasets/ds083.2/>) and  
91 the sea surface temperature datasets (<http://polar.ncep.noaa.gov/sst/>). The first two days were spin-up runs  
92 for simulations in this study. The nudging is carried out in every 6 hours for meteorological conditions,  
93 including wind, temperature and moisture.

94 The inventory, provided by TNO for the EUCAARI project (Kulmala et al., 2011), was adopted for the  
95 elemental carbon anthropogenic emission, with exclusion of point sources over Germany due to their  
96 remarkable uncertainties (Chen et al., 2016b). The hourly Fire INventory from NCAR (FINN, Wiedinmyer  
97 et al., 2011), with a horizontal resolution of 1 km, was employed. Model of Emissions of Gases and Aerosols  
98 from Nature (MEGAN, Guenther et al., 2006) was on-line coupled to provide biogenic emissions.

99 In this study, dust emission was not considered, because of its negligible contribution to total particle  
100 mass concentration during HOPE-Melpitz (Chen et al., 2016a) campaign, and besides, large uncertainty was  
101 reported for the parameterization of the dust emission in WRF-Chem (Saide et al., 2012).

102 The ‘Gong’ sea-salt aerosol emission scheme (Gong, 2003) was adopted with total sea-salt aerosol  
103 emission been reduced to 10% in the ‘Case\_SeasaltOn’ (Chen et al., 2016a). The modelled sea-salt mass  
104 concentrations were in good agreements with measurements over coastal region from European Monitoring  
105 and Evaluation Programme (EMEP, <http://www.emep.int>), with a factor (and correlation coefficient) of 0.85  
106 (0.67), 1.16 (0.80) and 0.83 (0.87) respectively for Bilthoven, Kollumerwaard and Vredepeel (Fig. S3).

107

108

109 **Section S3. Comparison between AERONET measurement and modelled AOD results**

110 The modelled aerosol optical depth (AOD) was evaluated against the AERONET dataset  
111 (AErosol RObotic NETwork, <http://aeronet.gsfc.nasa.gov/>, Level 2.0) over Europe. The direct (collimated)  
112 solar radiation observed by sun photometer was used to derive the AOD, which were pre- and post-field  
113 calibrated, manually inspected and automatically cloud cleared. The AOD at 550 nm wavelength was derived  
114 from the 500 nm wavelength data and the Ångström index in AERONET dataset. Please find more details  
115 about AERONET in <http://aeronet.gsfc.nasa.gov/>.

116 The simulated AOD (550 nm wavelength) of the ‘Case\_SeasaltOn’ was validated with the AERONET  
117 AOD measurements over Europe during 10-20 September 2013. The comparison was made in the daytime  
118 under clear-sky condition, when AERONET measurements were available, the highest AOD was found in  
119 the inland European region by both simulated and measured AOD, followed by the coastal regions, whereas  
120 the lowest AOD was found over Alpine regions. Generally, the pattern of AOD spatial distribution can be  
121 captured by model ( $R=0.64$ ), although it was overall overestimated with a geometric mean ratio (GMR)  
122 value of 1.7. Despite of some shortcomings of AOD modelling, the general performance is satisfactory and  
123 in line with previous studies (Li et al., 2013; Xu and Penner, 2012). The overestimation of AOD was reduced  
124 in our ‘Case\_SeasaltOn’ (sea-salt emission in a factor of 1) compared with Chen et al. (2016a), which  
125 reported an overestimation of AOD with GMR of 2.3 (F-CASE, sea-salt emission in a factor of 10) and 1.8  
126 (R-CASE, sea-salt emission in a factor of 0.5). The reduction of sea-salt aerosol contributes to the shrink of  
127 AOD when compare with the reported F-CASE, however, reduction of sea-salt aerosol should not be the  
128 reason of decreasing GMR when compare with the R-CASE. The ‘re-distribution effect’ of nitrate particle  
129 mass size distribution could be the reason for this.

130

131

132

133 **Section S4. Competition between ‘re-distribution effect’ and ‘mass-enhancement effect’**

134 The direct radiative forcing (DRF) of aerosol is strongly related with its aerosol optical depth (AOD)  
135 (Wang et al., 2014). During daytime on 19 September when marine air masses brought sea-salt aerosol to  
136 northern Poland, the nitrate AOD significantly decreased as a function of sea-salt mass concentration ( $[Na^+]$ ),  
137 due to the sea-salt-induced ‘re-distribution effect’ on nitrate particle mass size distribution (PMSD, Fig. 5

138 and 6a). As shown in Fig. 7a, the ‘re-distribution effect’ can averagely reduce AOD of nitrate ( $AOD_{\text{nitrate}}$ ) by  
139 ~20% when abundant sea-salt present with a molar ratio between particulate nitrate and sodium (RNS)  
140 smaller than 1, and reduce by 10-20% over regions where relatively high nitrate loading present with  $1 <$   
141  $RNS < 30$ . On the other hand, the sea-salt-induced increase of particulate nitrate mass concentration ( $[NO_3^-]$   
142 ], ‘mass-enhancement effect’) may enhance  $AOD_{\text{nitrate}}$  (Liao and Seinfeld, 2005). The  $AOD_{\text{nitrate}}$  could  
143 increase by up to 30% averagely by introducing sea-salt if only ‘mass-enhancement effect’ is considered  
144 (Fig. 7b). Fig. 7c shows the net effect as competition between the sea-salt-induced ‘re-distribution’ and  
145 ‘mass-enhancement’ effects. The clear-sky results over the entire European domain were used for the  
146 statistical analysis when sea-salt aerosol was transported over the European continent during 16-20  
147 September. In sea-salt-rich air masses ( $RNS < 1$ ), which mostly appear over the oceanic regions, the net  
148 effect tends to increase  $AOD_{\text{nitrate}}$  (as shown in Fig. 5a and Fig. 6b). Conversely, the ‘re-distribution effect’  
149 tends to overwhelm the ‘mass-enhancement effect’ resulting in a net effect with decreasing  $AOD_{\text{nitrate}}$  when  
150 the RNS is higher than 1. This is because a considerable amount of particulate nitrate is shifted from the fine  
151 to the coarse mode (‘re-distribution effect’) by the heterogeneous reactions on the surface of sea-salt aerosol  
152 and change of gas-particle equilibrium (Fig. 1). The largest mean value of  $AOD_{\text{nitrate}}$  net reduction over  
153 Europe was ~6% when RNS is ~10, with ~25% probability of  $AOD_{\text{nitrate}}$  net reduction by more than 10%  
154 (Fig. 7c). The mean value of reduction starts to decrease as RNS increases when  $RNS > 10$ . A possible  
155 explanation is that air masses with high  $[NO_3^-]$  are accompanied by a high level of anthropogenic  $NO_x$ , and  
156 hence more sodium chloride is consumed by the sea-salt-induced ‘mass-enhancement effect’, outcompeting  
157 the ‘re-distribution’ of nitrate PMSD and thus decreasing  $AOD_{\text{nitrate}}$ . When RNS is higher than 30, there is  
158 no significant change in  $AOD_{\text{nitrate}}$  (~50% probability for both increasing and decreasing), because of the  
159 very limited loading of sea-salt aerosol. In general, (1) the sea-salt-induced ‘mass-enhancement effect’ is  
160 dominant over oceanic regions and tends to increase  $AOD_{\text{nitrate}}$  when RNS is lower than 1; (2) the sea-salt-  
161 induced ‘re-distribution effect’ on nitrate PMSD can decrease  $AOD_{\text{nitrate}}$  by about 10-20% and overwhelm  
162 the ‘mass-enhancement effect’ resulting in a net reduction of  $AOD_{\text{nitrate}}$  when  $1 < RNS < 30$ ; and (3) the  
163 influence of sea-salt aerosol is not significant when RNS is higher than 30.

164  
165  
166

167 **Section S5. Moderating total aerosol cooling by the ‘re-distribution effect’ on nitrate**

168 The reduction of nitrate AOD may even lead to a decrease of total aerosol radiative effect; however, it  
169 is non-monotonic with sea-salt aerosol loading due to competition between the increasing of sea-salt AOD  
170 and decreasing of nitrate AOD. As shown in Fig. S6b, the total aerosol AOD ( $AOD_{total}$ , black line indicates  
171 the change of  $AOD_{total}$ ) firstly decreases with increasing  $[Na^+]$  and reaches the largest reduction of 0.03  
172 ( $\sim 11\%$ ) when  $[Na^+]$  was about  $0.4\text{--}0.6 \mu\text{g m}^{-3}$  in the ‘Case\_SeasaltOn’. Later, with further enhanced sea-salt  
173 aerosol emissions, the increase of sea-salt AOD ( $AOD_{NaCl}$ ) compensates the decrease of  $AOD_{nitrate}$  and  
174 dominates the change of  $AOD_{total}$ , eventually leading to a slow increase of  $AOD_{total}$  up to  $\sim 10\%$  with a sea-  
175 salt aerosol emission factor of 10. Our results indicate that the natural sea-salt aerosol may reduce the total  
176 light extinction when marine air masses mix with nitrate-rich air masses and sea-salt concentration is still  
177 relatively low. In view of Europe, this critical  $[Na^+]$  is estimated to be  $\sim 4\text{--}7 \mu\text{g m}^{-3}$ , see Fig. S6b and similar  
178 results at Melpitz/Leipzig (not shown here). For more polluted regions, such as the North China Plain and  
179 India, the critical  $[Na^+]$  is expected to be higher. The measurements of  $[Na^+]$  in Germany (Neumann et al.,  
180 2016), Florida USA (Gantt et al., 2015), and Sweden (Gustafsson and Franzén, 2000), where considerable  
181 amounts of sea-salt associated nitrate (about 1-3 ppbv, about 35-90% of total nitrate) are found (Xu and  
182 Penner, 2012), are summarized in Fig. 6c. Broadly speaking, the  $[Na^+]$  in these regions are in the range of  
183  $0\text{--}5 \mu\text{g m}^{-3}$ , with very rare exceptions at Westerland Germany (a coastal station) in winter. A similar level of  
184 sea-salt associated nitrate is reported by a regional model study over coastal regions of China and western  
185 Pacific Ocean (Li et al. 2018). This implies that the reduction of total aerosols light extinction due to sea-  
186 salt-induced ‘re-distribution effect’ may be commonly observed over the European continent, the coastal  
187 and outflow regions of US and China.

188

189

190

191

192



193 **Section S6. Uncertainty in estimation of  $\Delta AOD_{\text{nitrate}}$  resulted from ‘re-distribution effect’**

194 Our ‘Case\_SeasaltOff’ and ‘Case\_SeasaltOn’ simulations overestimate particulate nitrate mass  
195 concentration by a factor of ~5 compared with filter measurements at Melpitz. Overestimation of particulate  
196 nitrate is a common issue of simulations over Europe. Lecœur and Seigneur (2013) performed a 9-year  
197 simulation over Europe using Polyphemus/Polair3D model, validated model results with observations from  
198 EMEP stations and compared their results with AQMEII models (including CHIMERE, CALIOPE-EU,  
199 WRF-Chem and CMAQ). They found that all models overestimate particulate nitrate over Europe.  
200 Polyphemus/Polair3D model overestimates by a factor of 1-3 during summer (Lecœur and Seigneur, 2013);  
201 WRF-Chem overestimates by a factor of 3-6 during September (Tuccella et al., 2012); CHIMERE performs  
202 the best among all models but still overestimates nitrate by a factor of 1.7 during September-November (Péré  
203 et al., 2010). Another recent study carried out European simulation over period of 1994-2014 using a regional  
204 climate model (ALADIN-Climate) and validated nitrate simulation with surface observations from 33 EMEP  
205 stations (Drugé et al., 2019). They found that, i) nitrate starts to play the most important role on aerosol  
206 radiative forcing over Europe since 2005; ii) their model is able to reproduce surface distribution of nitrate  
207 however generally overestimate nitrate by factors of 2-5. The above results indicate that nitrate simulation  
208 in our model is within a comparable range with previous studies.

209 The ‘re-distribution effect’ on nitrate is captured well in our simulations (Fig. 4), although particulate  
210 nitrate mass is overestimated. This overestimation can lead to a more conservative assessment of  $\Delta AOD_{\text{nitrate}}$   
211 (surrogate of  $\Delta DRF_{\text{nitrate}}$ ), which is resulted from the ‘re-distribution effect’ (see Fig. 7a). But, this  
212 overestimation of nitrate would not have significant influence on the assessment of percentage change in  
213  $AOD_{\text{nitrate}}$ . Remarkable ‘re-distribution effect’ occurs in the regime of  $1 < RNS < 30$ , where consists of ~70%  
214 European results and  $AOD_{\text{nitrate}}$  is reduced by about 10-20% (Fig. 7a). The percentage change of  $AOD_{\text{nitrate}}$   
215 decreases very slowly as increase of RNS, which is proportional to nitrate mass concentration. A smaller  
216  $[NO_3^-]$  (or RNS) by a factor of 5 generally leads to a greater decreasing of  $AOD_{\text{nitrate}}$  in percentage by less  
217 than 10% (Fig. 7a). Therefore, our assessment of moderation in  $AOD_{\text{nitrate}}$  resulted from ‘re-distribution  
218 effect’ is robust (slightly conservative) and not significantly influenced by nitrate overestimation in this  
219 study.

220

221

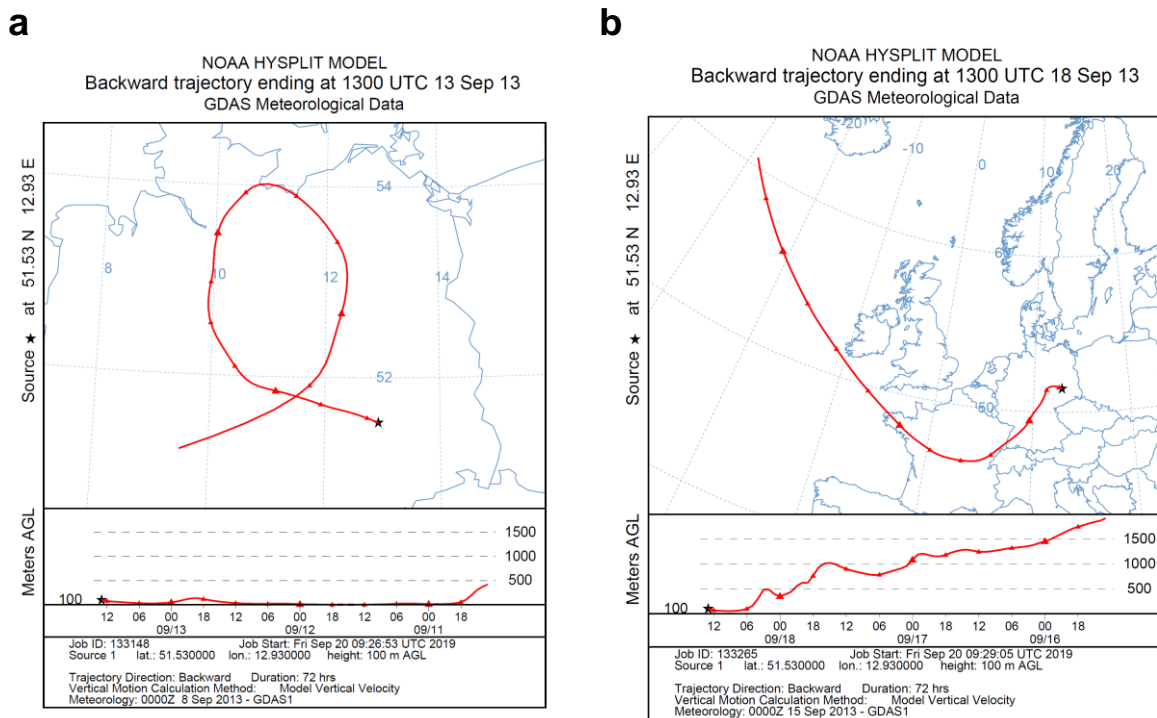

**Fig. S1. Three days back-trajectories for Melpitz, Germany.** (a) 13 September 2013, representing continental period; (b) 18 September 2013, representing marine period. The back-trajectories are calculated by Hysplit (<https://www.ready.noaa.gov/HYSPLIT.php>).

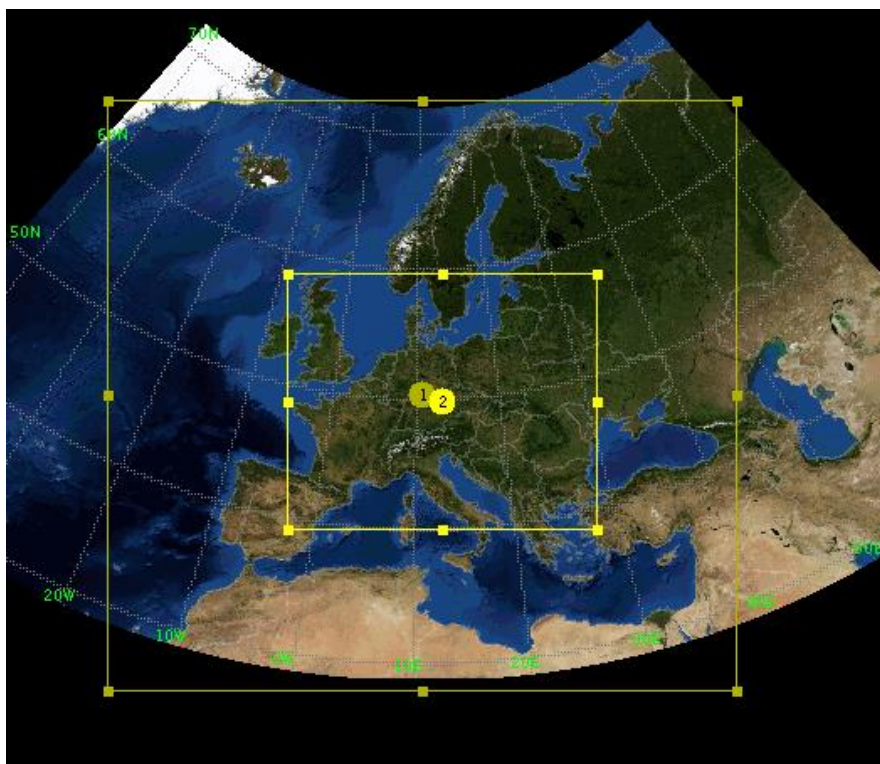

**Fig. S2. Domain setting of WRF-Chem European case.**

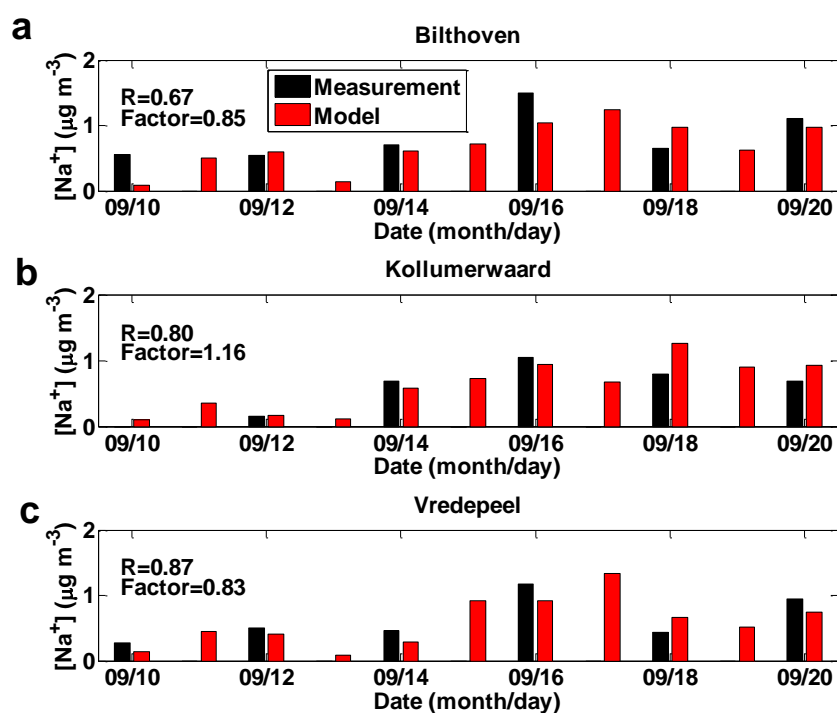

**Fig. S3.** Comparisons of sodium mass concentration ( $[Na^+]$ ) in  $PM_{10}$ . The filter sampler measurements at EMEP stations (Chen et al., 2016a) are in black bars, and the ‘Case\_SeasaltOn’ model results are in red bars. **a**, Bilthoven. **b**, Kollumerwaard. **c**, Vredepeel. The locations of stations are shown in Fig. 3.

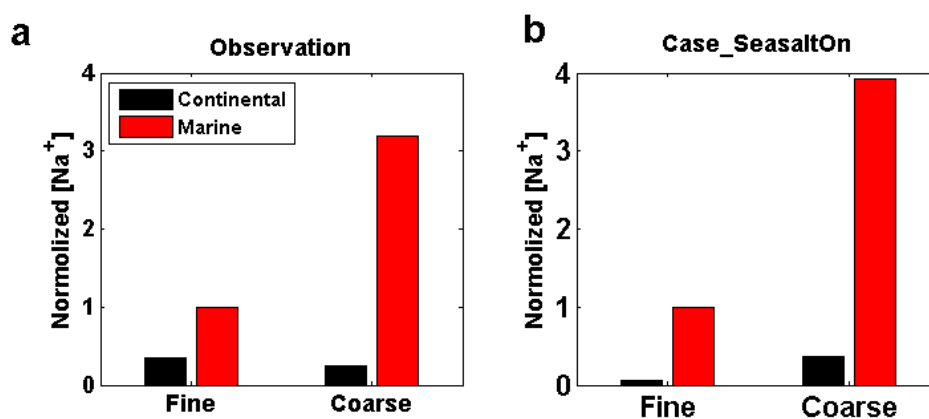

**Fig. S4.** Sodium mass concentration ( $[Na^+]$ ) normalized with the fine mode sodium concentration during the marine period. **a**, Berner impactor measurements. **b**, WRF-Chem ‘Case\_SeasaltOn’, i.e., with sea-salt emission. The results are grouped into continental (black bar) and marine (red bar) air mass types, respectively. The fine and coarse mode particles are defined as  $PM_{1,2}$  (particles with aerodynamic diameter smaller than  $1.2 \mu m$ ) and  $PM_{1,2-10}$  (particles with aerodynamic diameter between  $1.2 \mu m$  and  $10 \mu m$ ), respectively. Note: the sodium is negligible ( $< 0.5 \mu g m^{-3}$ ) for the ‘Case\_SeasaltOff’ simulated without sea-salt emission.

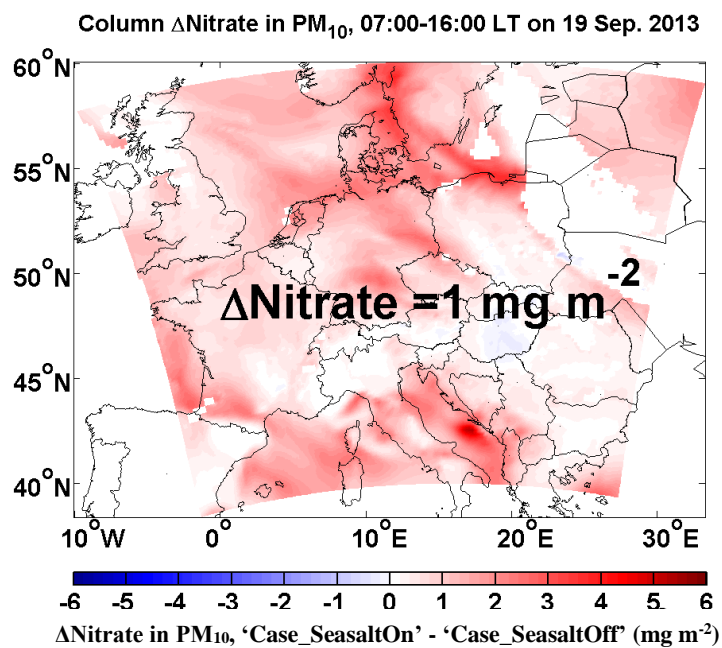

**Fig. S5. Influence of sea-salt aerosol on the simulated column nitrate loading in PM<sub>10</sub> ( $\Delta$ Nitrate).** The simulated  $\Delta$ Nitrate between the 'Case\_SeasaltOn' and 'Case\_SeasaltOff' simulations showed here are averaged during daytime, i.e., 07:00-16:00 local time (LT) on 19 September 2013.

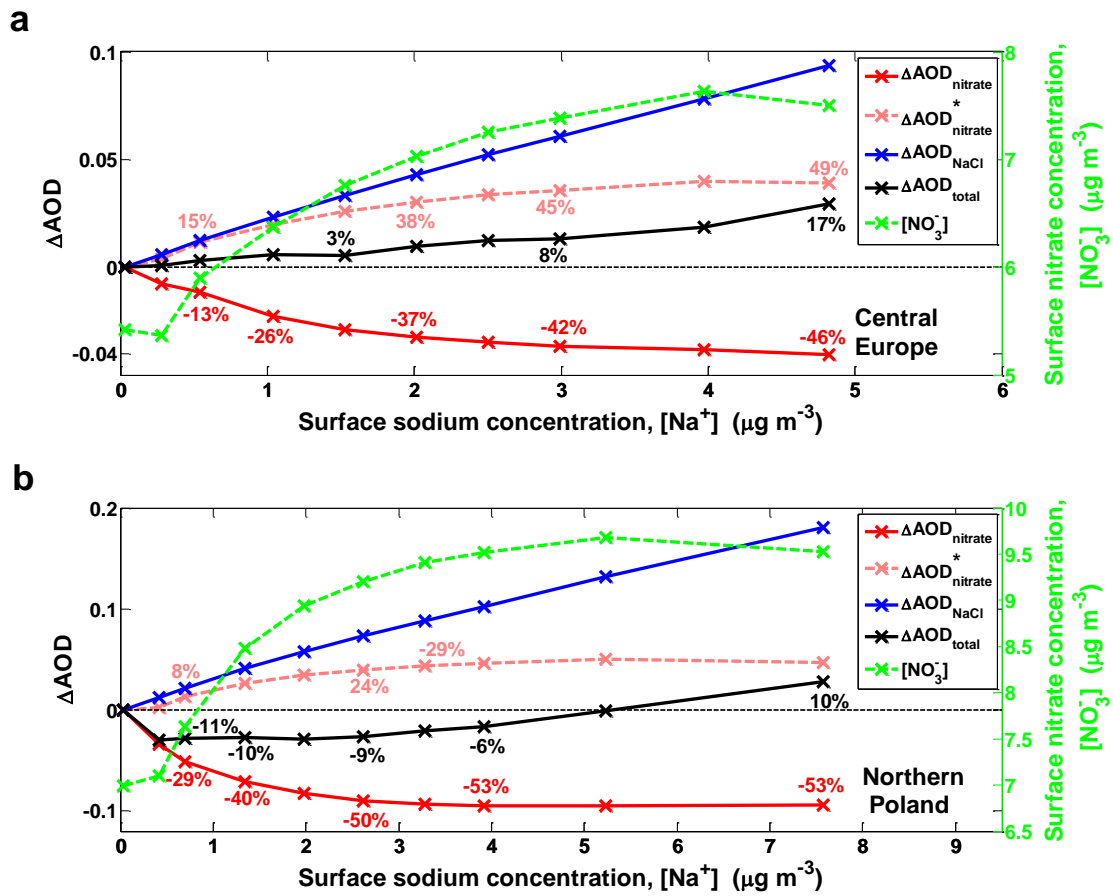

**Fig. S6.** Similar as Fig. 6. The additional black lines indicate the changes of total AOD ( $\Delta AOD_{total}$ ), including the reduction of nitrate AOD ( $\Delta AOD_{nitrate}$ ) and the enhancement of sea-salt AOD ( $\Delta AOD_{NaCl}$ ). **a**, Central Europe region; **b**, Northern Poland region. The regions are marked in Fig. 3.

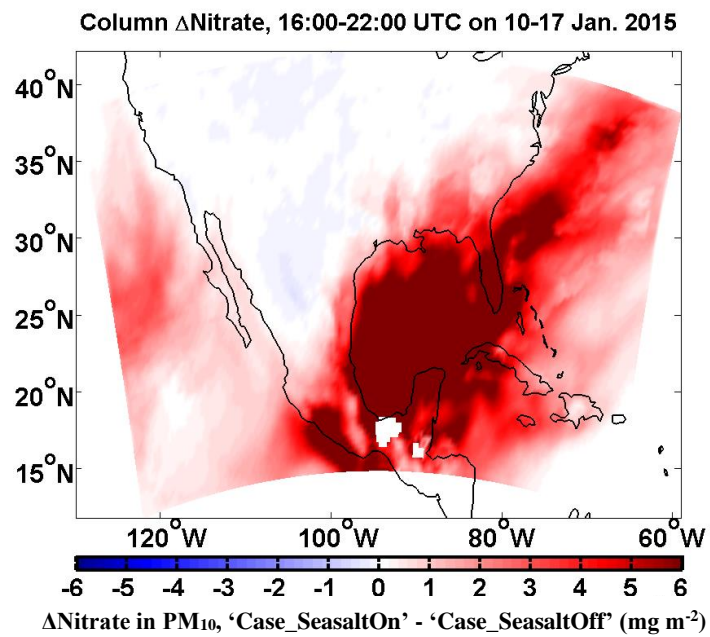

**Fig. S7. Influence of sea-salt aerosol on the simulated column nitrate loading in  $\text{PM}_{10}$  ( $\Delta$ Nitrate).** The simulated  $\Delta$ Nitrate between the 'Case\_SeasaltOn' and 'Case\_SeasaltOff' simulations showed here are averaged during the daytime over North America, i.e., 16:00-22:00 (UTC) on 10-17 January 2015.

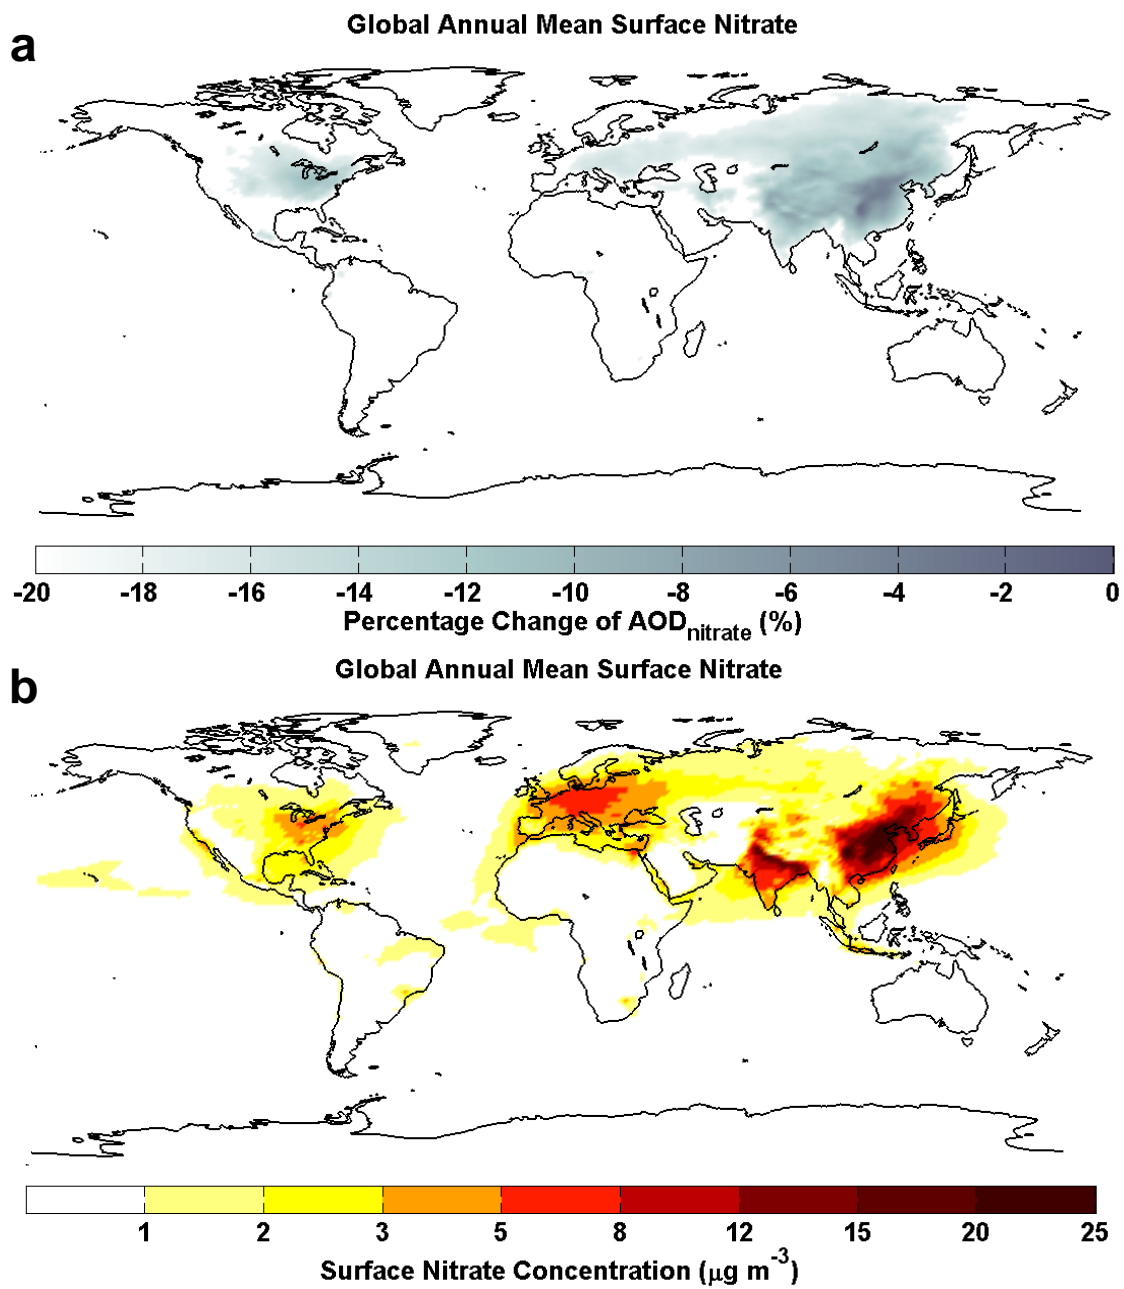

**Fig. S8.** Global distribution of percentage changes of  $AOD_{\text{nitrate}}$  (a) and surface nitrate concentration (b). The results are from EMAC model.

## References for SI:

- Adams, P. J., Seinfeld, J. H., Koch, D., Mickley, L., and Jacob, D.: General circulation model assessment of direct radiative forcing by the sulfate-nitrate-ammonium-water inorganic aerosol system, *Journal of Geophysical Research: Atmospheres*, 106, 1097-1111, 10.1029/2000JD900512, 2001.
- Bauer, S. E., Balkanski, Y., Schulz, M., Hauglustaine, D. A., and Dentener, F.: Global modeling of heterogeneous chemistry on mineral aerosol surfaces: Influence on tropospheric ozone chemistry and comparison to observations, *Journal of Geophysical Research: Atmospheres*, 109, D02304, 10.1029/2003JD003868, 2004.
- Bellouin, N., Rae, J., Jones, A., Johnson, C., Haywood, J., and Boucher, O.: Aerosol forcing in the Climate Model Intercomparison Project (CMIP5) simulations by HadGEM2-ES and the role of ammonium nitrate, *Journal of Geophysical Research: Atmospheres*, 116, D20206, 10.1029/2011JD016074, 2011.
- Bellouin, N., Mann, G. W., Woodhouse, M. T., Johnson, C., Carslaw, K. S., and Dalvi, M.: Impact of the modal aerosol scheme GLOMAP-mode on aerosol forcing in the Hadley Centre Global Environmental Model, *Atmos. Chem. Phys.*, 13, 3027-3044, 10.5194/acp-13-3027-2013, 2013.
- Capaldo, P. K., Pilinis, C., and Pandis, S. N.: A computationally efficient hybrid approach for dynamic gas/aerosol transfer in air quality models, *Atmospheric Environment*, 34, 3617-3627, [http://dx.doi.org/10.1016/S1352-2310\(00\)00092-3](http://dx.doi.org/10.1016/S1352-2310(00)00092-3), 2000.
- Chen, Y., Cheng, Y., Ma, N., Wolke, R., Nordmann, S., Schüttauf, S., Ran, L., Wehner, B., Birmili, W., van der Gon, H. A. C. D., Mu, Q., Barthel, S., Spindler, G., Stieger, B., Müller, K., Zheng, G. J., Pöschl, U., Su, H., and Wiedensohler, A.: Sea salt emission, transport and influence on size-segregated nitrate simulation: a case study in northwestern Europe by WRF-Chem, *Atmos. Chem. Phys.*, 16, 12081-12097, 10.5194/acp-16-12081-2016, 2016a.
- Chen, Y., Cheng, Y. F., Nordmann, S., Birmili, W., Denier van der Gon, H. A. C., Ma, N., Wolke, R., Wehner, B., Sun, J., Spindler, G., Mu, Q., Pöschl, U., Su, H., and Wiedensohler, A.: Evaluation of the size segregation of elemental carbon (EC) emission in Europe: influence on the simulation of EC long-range transportation, *Atmos. Chem. Phys.*, 16, 1823-1835, 10.5194/acp-16-1823-2016, 2016b.
- Drugé, T., Nabat, P., Mallet, M., and Somot, S.: Model simulation of ammonium and nitrate aerosols distribution in the Euro-Mediterranean region and their radiative and climatic effects over 1979–2016, *Atmos. Chem. Phys.*, 19, 3707-3731, 10.5194/acp-19-3707-2019, 2019.
- Gantt, B., Kelly, J. T., and Bash, J. O.: Updating sea spray aerosol emissions in the Community Multiscale Air Quality (CMAQ) model version 5.0.2, *Geosci. Model Dev.*, 8, 3733-3746, 10.5194/gmd-8-3733-2015, 2015.
- Gong, S. L.: A parameterization of sea-salt aerosol source function for sub- and super-micron particles, *Global Biogeochemical Cycles*, 17, 10.1029/2003GB002079, 2003.
- Guenther, A., Karl, T., Harley, P., Wiedinmyer, C., Palmer, P. I., and Geron, C.: Estimates of global terrestrial isoprene emissions using MEGAN (Model of Emissions of Gases and Aerosols from Nature), *Atmos. Chem. Phys.*, 6, 3181-3210, 10.5194/acp-6-3181-2006, 2006.
- Gustafsson, M. E. R., and Franzén, L. G.: Inland transport of marine aerosols in southern Sweden, *Atmospheric Environment*, 34, 313-325, [http://dx.doi.org/10.1016/S1352-2310\(99\)00198-3](http://dx.doi.org/10.1016/S1352-2310(99)00198-3), 2000.
- Hauglustaine, D. A., Balkanski, Y., and Schulz, M.: A global model simulation of present and future nitrate aerosols and their direct radiative forcing of climate, *Atmos. Chem. Phys.*, 14, 11031-11063, 10.5194/acp-14-11031-2014, 2014.
- IPCC: Climate Change 2013: The Physical Science Basis. Contribution of Working Group I to the Fifth Assessment Report of the Intergovernmental Panel on Climate Change, Report, edited by: Stocker, T. F., Qin D. H., Plattner, G. K., Tignor, M. M. B., Allen, S. K., Boschung, J., Nauels, A., Xia, Y., Bex, V., and Midgley, P. M., Cambridge University Press, New York, available at: <http://www.ipcc.ch/report/ar5> (last access: 10 September, 2016), 2013.
- Karydis, V. A., Tsimpidi, A. P., Pozzer, A., Astitha, M., and Lelieveld, J.: Effects of mineral dust on global atmospheric nitrate concentrations, *Atmos. Chem. Phys.*, 16, 1491-1509, 10.5194/acp-16-1491-2016, 2016.
- Kulmala, M., Asmi, A., Lappalainen, H. K., Baltensperger, U., Brenguier, J. L., Facchini, M. C., Hansson,



- H. C., Hov, Ø., O'Dowd, C. D., Pöschl, U., Wiedensohler, A., Boers, R., Boucher, O., de Leeuw, G., Denier van der Gon, H. A. C., Feichter, J., Krejci, R., Laj, P., Lihavainen, H., Lohmann, U., McFiggans, G., Mentel, T., Pilinis, C., Riipinen, I., Schulz, M., Stohl, A., Swietlicki, E., Vignati, E., Alves, C., Amann, M., Ammann, M., Arabas, S., Artaxo, P., Baars, H., Beddows, D. C. S., Bergström, R., Beukes, J. P., Bilde, M., Burkhardt, J. F., Canonaco, F., Clegg, S. L., Coe, H., Crumeyrolle, S., D'Anna, B., Decesari, S., Gilardoni, S., Fischer, M., Fjaeraa, A. M., Fountoukis, C., George, C., Gomes, L., Halloran, P., Hamburger, T., Harrison, R. M., Herrmann, H., Hoffmann, T., Hoose, C., Hu, M., Hyvärinen, A., Hörrak, U., Iinuma, Y., Iversen, T., Josipovic, M., Kanakidou, M., Kiendler-Scharr, A., Kirkevåg, A., Kiss, G., Klimont, Z., Kolmonen, P., Komppula, M., Kristjánsson, J. E., Laakso, L., Laaksonen, A., Labonnote, L., Lanz, V. A., Lehtinen, K. E. J., Rizzo, L. V., Makkonen, R., Manninen, H. E., McMeeking, G., Merikanto, J., Minikin, A., Mirme, S., Morgan, W. T., Nemitz, E., O'Donnell, D., Panwar, T. S., Pawlowska, H., Petzold, A., Pienaar, J. J., Pio, C., Plass-Duelmer, C., Prévôt, A. S. H., Pryor, S., Reddington, C. L., Roberts, G., Rosenfeld, D., Schwarz, J., Seland, Ø., Sellegri, K., Shen, X. J., Shiraiwa, M., Siebert, H., Sierau, B., Simpson, D., Sun, J. Y., Topping, D., Tunved, P., Vaattovaara, P., Vakkari, V., Veefkind, J. P., Visschedijk, A., Vuollekoski, H., Vuolo, R., Wehner, B., Wildt, J., Woodward, S., Worsnop, D. R., van Zadelhoff, G. J., Zardini, A. A., Zhang, K., van Zyl, P. G., Kerminen, V. M., Carslaw, K., and Pandis, S. N.: General overview: European Integrated project on Aerosol Cloud Climate and Air Quality interactions (EUCAARI) – integrating aerosol research from nano to global scales, *Atmos. Chem. Phys.*, 11, 13061-13143, 10.5194/acp-11-13061-2011, 2011.
- Lecœur, È., and Seigneur, C.: Dynamic evaluation of a multi-year model simulation of particulate matter concentrations over Europe, *Atmos. Chem. Phys.*, 13, 4319-4337, 10.5194/acp-13-4319-2013, 2013.
- Li, J., Han, Z., and Yao, X.: A modeling study of the influence of sea salt on inorganic aerosol concentration, size distribution, and deposition in the western Pacific Ocean, *Atmospheric Environment*, <https://doi.org/10.1016/j.atmosenv.2018.06.030>, 2018.
- Li, S., Garay, M. J., Chen, L., Rees, E., and Liu, Y.: Comparison of GEOS-Chem aerosol optical depth with AERONET and MISR data over the contiguous United States, *Journal of Geophysical Research: Atmospheres*, 118, 11,228-211,241, 10.1002/jgrd.50867, 2013.
- Liao, H., and Seinfeld, J. H.: Global impacts of gas-phase chemistry-aerosol interactions on direct radiative forcing by anthropogenic aerosols and ozone, *Journal of Geophysical Research: Atmospheres*, 110, D18208, 10.1029/2005JD005907, 2005.
- Mann, G. W., Carslaw, K. S., Spracklen, D. V., Ridley, D. A., Manktelow, P. T., Chipperfield, M. P., Pickering, S. J., and Johnson, C. E.: Description and evaluation of GLOMAP-mode: a modal global aerosol microphysics model for the UKCA composition-climate model, *Geosci. Model Dev.*, 3, 519-551, 10.5194/gmd-3-519-2010, 2010.
- Metzger, S., Dentener, F., Krol, M., Jeuken, A., and Lelieveld, J.: Gas/aerosol partitioning 2. Global modeling results, *Journal of Geophysical Research: Atmospheres*, 107, ACH 17-11-ACH 17-23, 10.1029/2001JD001103, 2002a.
- Metzger, S., Dentener, F., Pandis, S., and Lelieveld, J.: Gas/aerosol partitioning: 1. A computationally efficient model, *Journal of Geophysical Research: Atmospheres*, 107, 4312, 10.1029/2001JD001102, 2002b.
- Myhre, G., Grini, A., and Metzger, S.: Modelling of nitrate and ammonium-containing aerosols in presence of sea salt, *Atmos. Chem. Phys.*, 6, 4809-4821, 10.5194/acp-6-4809-2006, 2006.
- Nenes, A., Pandis, S. N., and Pilinis, C.: ISORROPIA: A New Thermodynamic Equilibrium Model for Multiphase Multicomponent Inorganic Aerosols, *Aquatic Geochemistry*, 4, 123-152, 10.1023/a:1009604003981, 1998.
- Neumann, D., Matthias, V., Bieser, J., Aulinger, A., and Quante, M.: A comparison of sea salt emission parameterizations in northwestern Europe using a chemistry transport model setup, *Atmos. Chem. Phys.*, 16, 9905-9933, 10.5194/acp-16-9905-2016, 2016.
- Péré, J. C., Mallet, M., Pont, V., and Bessagnet, B.: Evaluation of an aerosol optical scheme in the chemistry-transport model CHIMERE, *Atmospheric Environment*, 44, 3688-3699, <https://doi.org/10.1016/j.atmosenv.2010.06.034>, 2010.
- Pringle, K. J., Tost, H., Message, S., Steil, B., Giannadaki, D., Nenes, A., Fountoukis, C., Stier, P., Vignati, E., and Lelieveld, J.: Description and evaluation of GMXe: a new aerosol submodel for global

- simulations (v1), *Geosci. Model Dev.*, 3, 391-412, 10.5194/gmd-3-391-2010, 2010.
- Saide, P. E., Spak, S. N., Carmichael, G. R., Mena-Carrasco, M. A., Yang, Q., Howell, S., Leon, D. C., Snider, J. R., Bandy, A. R., Collett, J. L., Benedict, K. B., de Szoeke, S. P., Hawkins, L. N., Allen, G., Crawford, I., Crosier, J., and Springston, S. R.: Evaluating WRF-Chem aerosol indirect effects in Southeast Pacific marine stratocumulus during VOCALS-REx, *Atmos. Chem. Phys.*, 12, 3045-3064, 10.5194/acp-12-3045-2012, 2012.
- Shindell, D. T., Lamarque, J. F., Schulz, M., Flanner, M., Jiao, C., Chin, M., Young, P. J., Lee, Y. H., Rotstayn, L., Mahowald, N., Milly, G., Faluvegi, G., Balkanski, Y., Collins, W. J., Conley, A. J., Dalsoren, S., Easter, R., Ghan, S., Horowitz, L., Liu, X., Myhre, G., Nagashima, T., Naik, V., Rumbold, S. T., Skeie, R., Sudo, K., Szopa, S., Takemura, T., Voulgarakis, A., Yoon, J. H., and Lo, F.: Radiative forcing in the ACCMIP historical and future climate simulations, *Atmos. Chem. Phys.*, 13, 2939-2974, 10.5194/acp-13-2939-2013, 2013.
- Tuccella, P., Curci, G., Visconti, G., Bessagnet, B., Menut, L., and Park, R. J.: Modeling of gas and aerosol with WRF/Chem over Europe: Evaluation and sensitivity study, *Journal of Geophysical Research: Atmospheres*, 117, 10.1029/2011jd016302, 2012.
- Vignati, E., Wilson, J., and Stier, P.: M7: An efficient size-resolved aerosol microphysics module for large-scale aerosol transport models, *Journal of Geophysical Research: Atmospheres*, 109, D22202, 10.1029/2003JD004485, 2004.
- Wang, Q., Jacob, D. J., Spackman, J. R., Perring, A. E., Schwarz, J. P., Moteki, N., Marais, E. A., Ge, C., Wang, J., and Barrett, S. R. H.: Global budget and radiative forcing of black carbon aerosol: Constraints from pole-to-pole (HIPPO) observations across the Pacific, *Journal of Geophysical Research: Atmospheres*, 119, 195-206, 10.1002/2013JD020824, 2014.
- Wexler, A. S., and Clegg, S. L.: Atmospheric aerosol models for systems including the ions  $H^+$ ,  $NH_4^+$ ,  $Na^+$ ,  $SO_4^{2-}$ ,  $NO_3^-$ ,  $Cl^-$ ,  $Br^-$ , and  $H_2O$ , *Journal of Geophysical Research: Atmospheres*, 107, 4207, doi:10.1029/2001JD000451, 2002.
- Wiedinmyer, C., Akagi, S. K., Yokelson, R. J., Emmons, L. K., Al-Saadi, J. A., Orlando, J. J., and Soja, A. J.: The Fire INventory from NCAR (FINN): a high resolution global model to estimate the emissions from open burning, *Geosci. Model Dev.*, 4, 625-641, 10.5194/gmd-4-625-2011, 2011.
- Xu, L., and Penner, J. E.: Global simulations of nitrate and ammonium aerosols and their radiative effects, *Atmos. Chem. Phys.*, 12, 9479-9504, 10.5194/acp-12-9479-2012, 2012.
- Yu, F., and Luo, G.: Simulation of particle size distribution with a global aerosol model: contribution of nucleation to aerosol and CCN number concentrations, *Atmos. Chem. Phys.*, 9, 7691-7710, 10.5194/acp-9-7691-2009, 2009.
- Zaveri, R. A., Easter, R. C., Fast, J. D., and Peters, L. K.: Model for Simulating Aerosol Interactions and Chemistry (MOSAIC), *Journal of Geophysical Research: Atmospheres*, 113, 10.1029/2007JD008782, 2008.
